# Supplementary material
Source: PubMed Central journal article supplement (PMC7120228)
Supplement: NIHMS1572546-supplement-SM.pdf [file NIHMS1572546-supplement-SM.pdf]

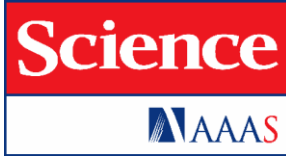

Supplementary Materials for  
**Functional diversity of human intrinsically photosensitive retinal  
ganglion cells**

Ludovic S. Mure\*, Frans Vinberg, Anne Hanneken, Satchidananda Panda\*

\*Corresponding author. Email: lmure@salk.edu (L.S.M.); panda@salk.edu (S.P.)

Published 6 December 2019, *Science* **366**, 1251 (2019)  
DOI: 10.1126/science.aaz0898

**This PDF file includes:**

Materials and Methods  
Figs. S1 to S6  
Tables S1 to S3  
References

## Materials and Methods

*Donors:* Post-mortem human eyes were obtained through the San Diego Eye Bank and Lifesharing with ethical approval from the Scripps Health Investigational Review Board. Whole eye globes were enucleated and placed into oxygenated Ames' under bright surgical light within 1/2-5 hours (details about the eyes are summarized in **TableS1**). They were immediately transported to the site of electrophysiology experiments at the Salk Institute in a light-tight container and all the subsequent procedures were conducted under dim red light. Cornea, lens and most of the vitreous were removed immediately after transportation and the posterior eyecups were kept in darkness for an additional hour to allow pigment regeneration via retinal pigment epithelium. For each donors, both eyes were used. Patches of the retina (4 or 6 mm in diameter) centered at ~3 mm from the optic nerve were punched through vitreous and pieces of the neural retina were stored in continuously oxygenated Ames' medium in darkness until the start of the electrophysiology experiments (2-7 hours after death).

*Mice:* All animal care and procedures were approved by the Institutional Animal Care and Use Committee of the Salk Institute for Biological Studies. C3H/HeJ strain (*rd*) carrying *Pde6b*<sup>rd1</sup> mutation was obtained from the Jackson Laboratory. These mice are deficient in the  $\beta$ -subunit of phosphodiesterase that results in rapid rods death followed by cones loss. Mice were housed under 12-hr light:12-hr dark cycles (lights on at 6 AM). Standard laboratory chow and water were available *ad libitum*. All recordings were performed on retina obtained from 8-10 weeks old animals between 9 AM to 12 PM.

*Multi Electrodes Array (MEA) recording:* Patches of retina were mounted on MEA (Multichannel Systems, Reutlingen, Germany), ganglion cell side down, and perfused with oxygenated Ames' medium (Sigma-Aldrich, A1420-10X1L) at 34°C supplemented with 20 μM CNQX and 50 μM D-APV to block glutamatergic transmission. The activity of ganglion cells was recorded via 256 electrodes 30 μm in diameter spaced every 100 μm apart and arranged in a 16 × 16 square grid. Full-field visual stimuli at flux from  $\sim 5 \times 10^{11}$  to  $5 \times 10^{14}$  photons/cm<sup>2</sup>/s at the retina were presented during recordings using high brightness LED (LuxeonStar 5, luxeonstar.com) at wavelengths of 447, 470, 505, 530, and 560 nm. The current through the LEDs was controlled using custom electronics and software written in MATLAB (Mathworks, Natick, MA) and synchronized with the physiological recording with a resolution of  $\pm 100$  μs. The signal was acquired from all 256 channels @ 10 kHz. Negative thresholds for spike detection were set at 5 times the standard deviation of the noise on each channel. Spike cutouts, consisting of 1 msec preceding and 2 msec after a suprathreshold event, along with a timestamp of the trigger was written to hard disk. For each electrode, these spike cutouts were sorted into trains of a single cell after recording using Offline Sorter (Plexon, Denton, TX). Data analysis and display were performed using Neuroexplorer (Plexon) and custom software written in MATLAB. Opsinamide (AA92593) was obtained through Princeton BioMolecular Research (NJ, US) and supplemented to Ames' medium at 10 μM in dissolved in DMSO (0.1%).

*11-cis* retinaldehyde was obtained through NEI ([https://www.nei.nih.gov/funding/11\\_cis\\_retinal](https://www.nei.nih.gov/funding/11_cis_retinal)). For the chromophore supply experiment, the regular recording medium was switched to the same Ames' medium supplemented with  $\sim 25$  μM *11-cis* retinal dissolved in 0.1% ethanol, a concentration in the range of retinoids use in mouse studies (17, 23) and the estimation for the human eye (24, 25).

*Analysis:* The response discharge rate was calculated as the average of the discharge rate measured during the stimulation (30s unless otherwise stated) minus the average discharge rate measure during the 30s prior to the stimulation (baseline). The response latency was defined as the delay between the start of the stimulation and the response crossing a threshold set at baseline +2\*SD. The response was considered over after firing rate dropped below the baseline level for more than 3 seconds. The dose-response curve (DRC) was obtained by plotting the response (Y, discharge rate) as a function of the irradiance of the stimulation (X, photon/cm<sup>2</sup>/s). For types 1 and 2, the DRC was fitted by a Michaelis-Menten function of the form;  $Y=R_{max}*X/(EC50+X)$  where Rmax is the maximum response (discharge rate) and EC50 is the irradiance required to drive a 50 percent response. Relative sensitivity for each wavelength was estimated by multiplying the inverse of the EC50 at this wavelength by the EC50 for the wavelength of greatest sensitivity (lowest EC50). The average relative sensitivity was plotted against Lamb templates of Vitamin A based pigment spectral sensitivity of varying wavelengths (19), and the sum of least squares was calculated to find the curve with the best fit to our measured data. The peak of this curve was assigned as the  $\lambda_{max}$  of human ipRGCs. Custom Matlab codes were used for all analyses. Given the limited range of responses displayed by type 3 cells, we did not fit their DRC by a Michaelis-Menten function but simply performed a linear regression to approximate half-saturation values.

*ipRGCs clustering:* Responses of adult ipRGCs to 470 nm light at four different intensities ( $2.9 \times 10^{11}$ ,  $3.5 \times 10^{12}$ ,  $2 \times 10^{13}$ , and  $2 \times 10^{14}$  photons/cm<sup>2</sup>/s) were utilized using light-induced spike trains parameters. As in each donor, time course, sensitivity, and duration of the ipRGCs

responses were visually segregated in two populations, we performed k-means clustering on these different parameters. Time course and duration were normalized to the maximum to allow for comparison between donors. Independently from the initial value of clusters we input, ipRGCs response time course, sensitivity, and duration always formed two main groups. Hierarchical clustering leads to the same results.

As for extracellular MEA recordings, Tu et al. (2005) (3) used latency in addition to sensitivity to distinguish functional types of ipRGCs in the mouse, we performed principal component analysis (PCA) on sensitivity, duration, and latency of the response. PCA allowed reducing the dimensionality of the data set; the first two principal components accounted for almost 95% of the variance (PC1=79.1% and PC2=14.6%). Thus, we next performed k-means clustering analysis on the first two principal components. This model produced clusters that corresponded to the initial analysis.

To objectively determine the number of clusters, ipRGCs first two principal components were fit with Gaussian mixture distributions or Gaussian mixture models (GMMs). We produced separate GMMs for 1, 2, and 3 ipRGCs clusters and then used the Akaike information criterion (AIC) to determine which GMM reported best the ipRGCs distribution. AIC is a model selection tool used to compare multiple models fit the same data. AIC is a likelihood-based measure of model fit that includes a penalty for complexity, specifically, the number of parameters. When we compared the 1, 2, and 3 cluster models, the model with the smallest AIC value (best model) was the 2 clusters model.

Results obtained in presence of 11-cis retinal were analyzed similarly. When pulled and analyzed all together recordings performed with and without exogenous 11-cis retinal, GMM models (1 to 4 clusters) and AIC comparison now pointed out the 3 clusters model as best fitting the data.

Matlab (2019a) was used for k-means and hierarchical clusterings, PCA, GMM, and AIC analysis (Statistics and Machine Learning Toolbox).

### **Quantification and Statistical Analysis**

All data are expressed as means  $\pm$  SEM or median and whiskers box (10th to 90th percentiles) unless stated otherwise. GraphPad Prism was used for all statistical analyses. Statistical tests used are stated in the figures legends. Differences between groups were considered statistically significant for  $p < 0.05$ .

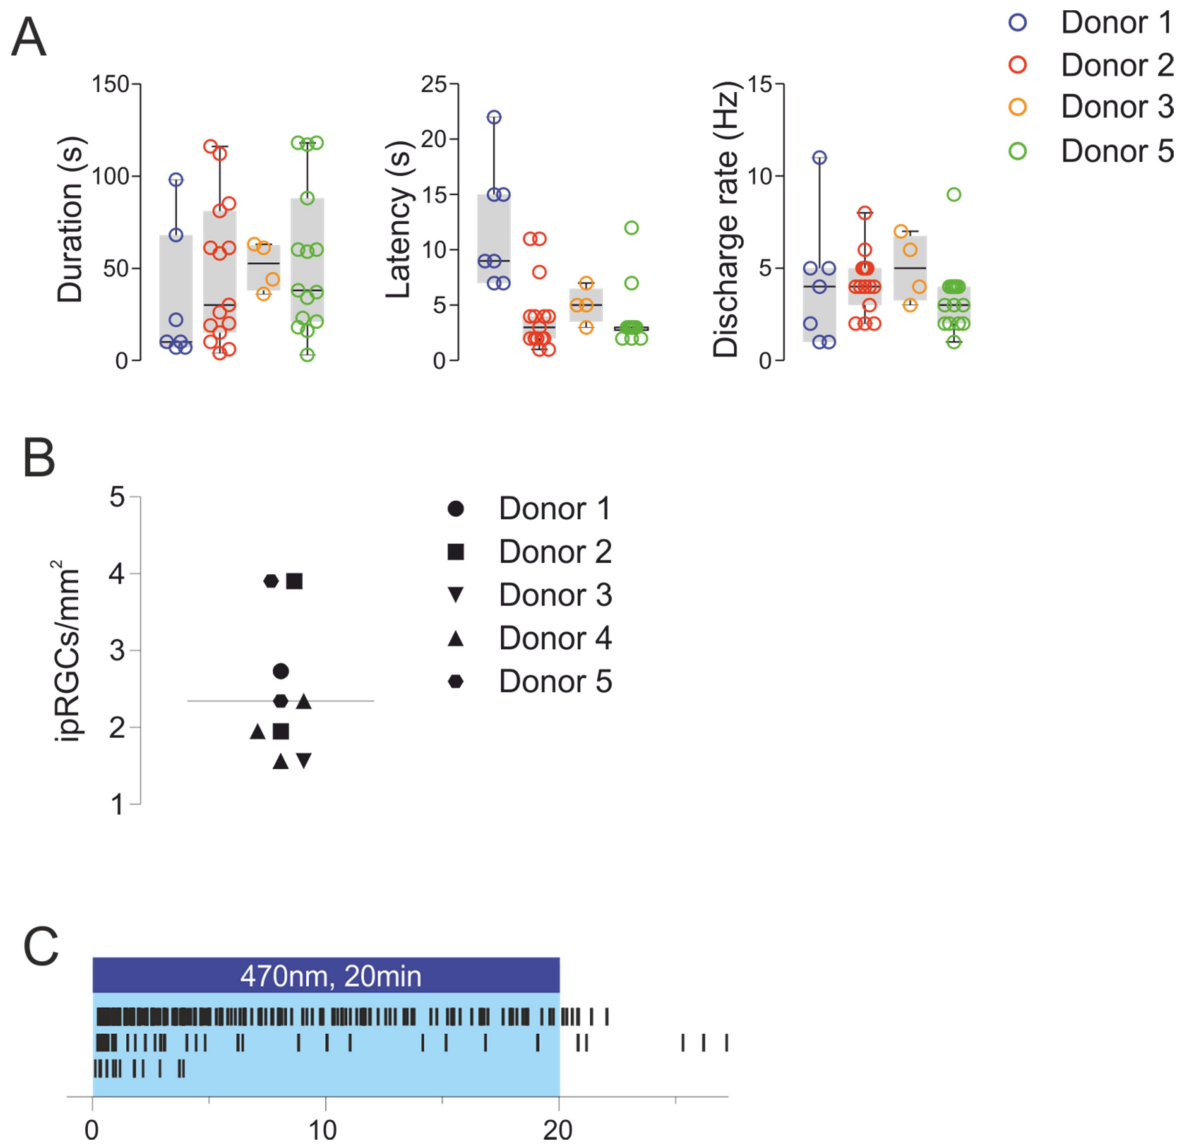

**Fig. S1: A subset of human RGCs is intrinsically photosensitive.** (A) Response average rate, peak, latency, and duration for each donors (donors 1, 2, 3, and 5, respectively  $n=7, 15, 4,$  and  $15$ ) to  $30s$  light pulses ( $2 \times 10^{13}$  photons/cm<sup>2</sup>/s,  $470nm$ ). (B) The density of responsive cells in different pieces from each donor. (C) Individual ipRGC responses to  $20$  min light stimulation ( $\sim 10^{13}$  photons/cm<sup>2</sup>/s,  $470nm$ ).

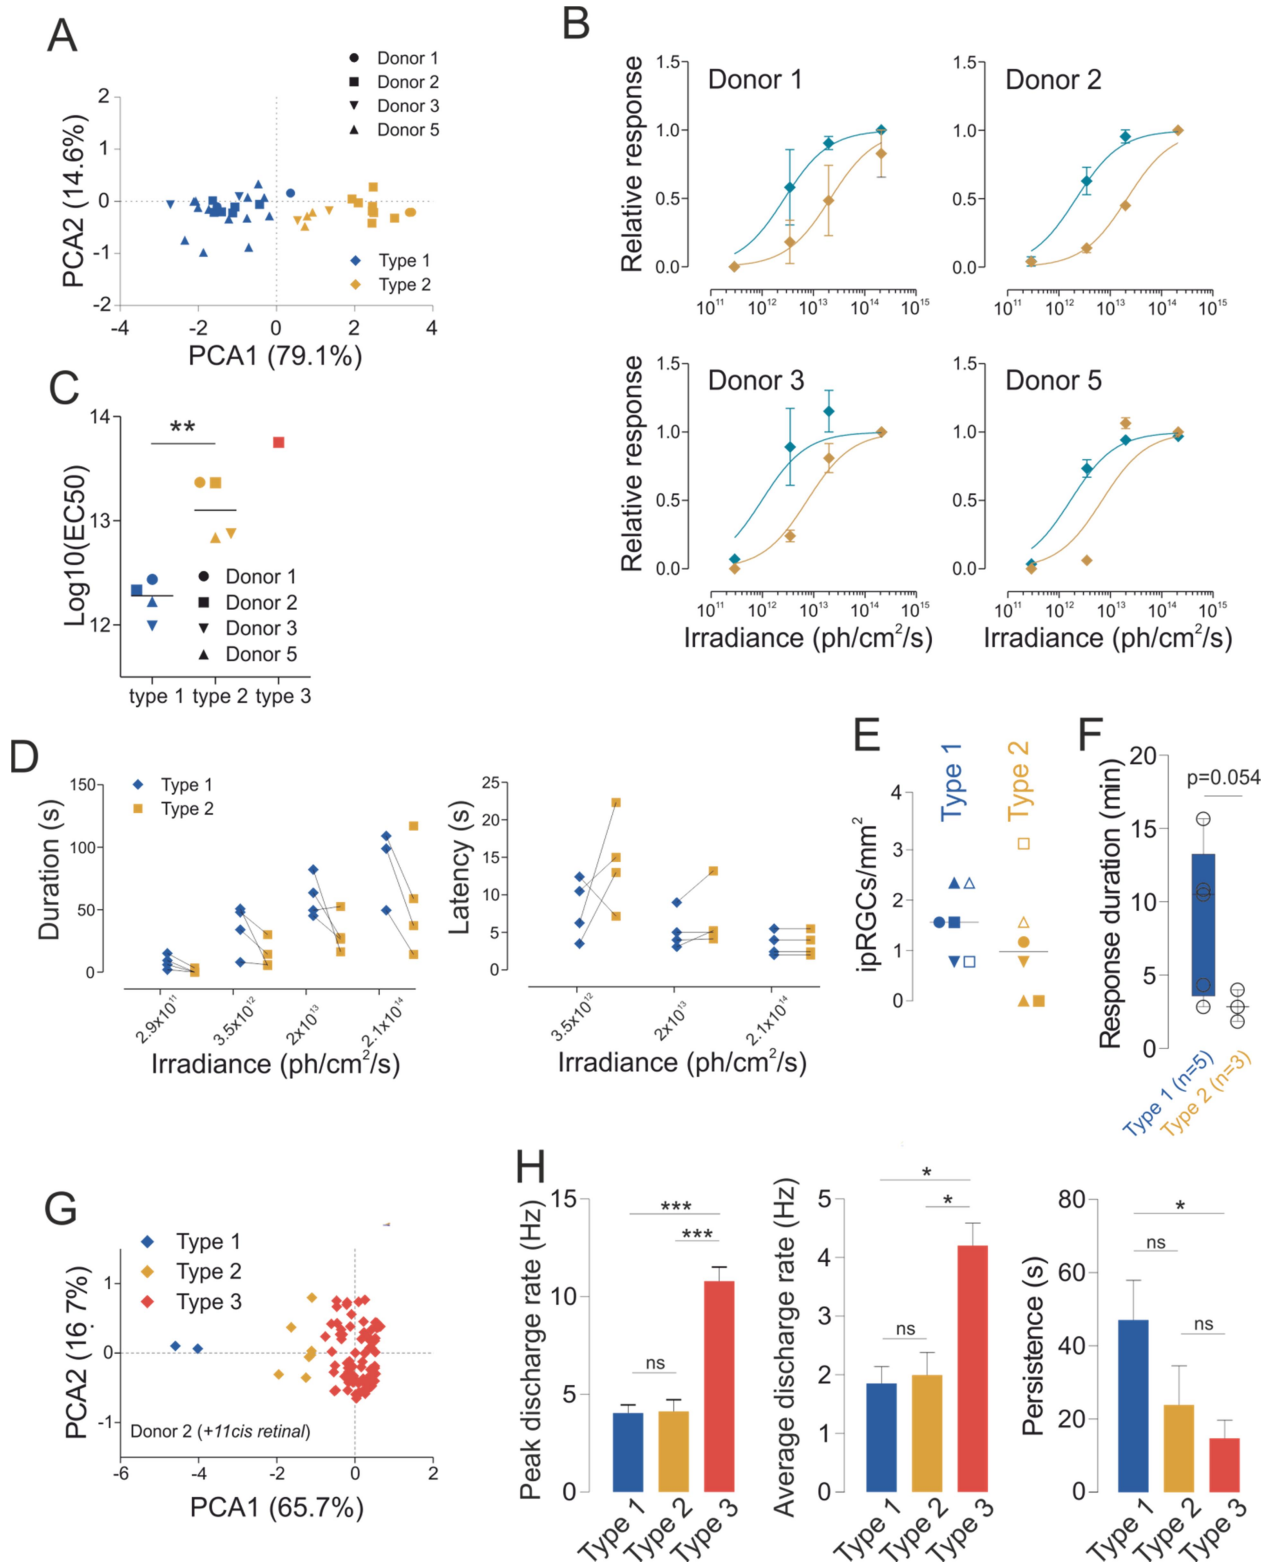



**Fig. S2: Human ipRGCs display different subtypes.** (A) PCA of the ipRGCs response parameters (sensitivity, latency, and duration, n=42, 4 donors). (B) Dose-response curves by subtypes in each donor. (C) ipRGCs subtypes EC50 in each donor (Student t-test, p=0.00187). (D) ipRGCs response latency and duration in each donor by subtypes. (E) Density of each subtypes across donors. (F) Type 1 and 2 ipRGCs average response duration to 10 min light stimulations. (G) PCA of the ipRGCs response parameters (sensitivity, latency, and duration, n=88, 1 donor) after incubation in *11-cis* retinal. (H) Average ipRGCs subtypes response peak (*left*), average (*center*), and persistence (*right*) to a 30s, 470nm,  $2 \times 10^{14}$  photons/cm<sup>2</sup>/s light stimulus (\*\*\*p<0.001, \*p<0.05, one-way ANOVA and Bonferroni *post hoc* tests, n=23, 19, and 78 for types 1, 2, and 3 respectively).

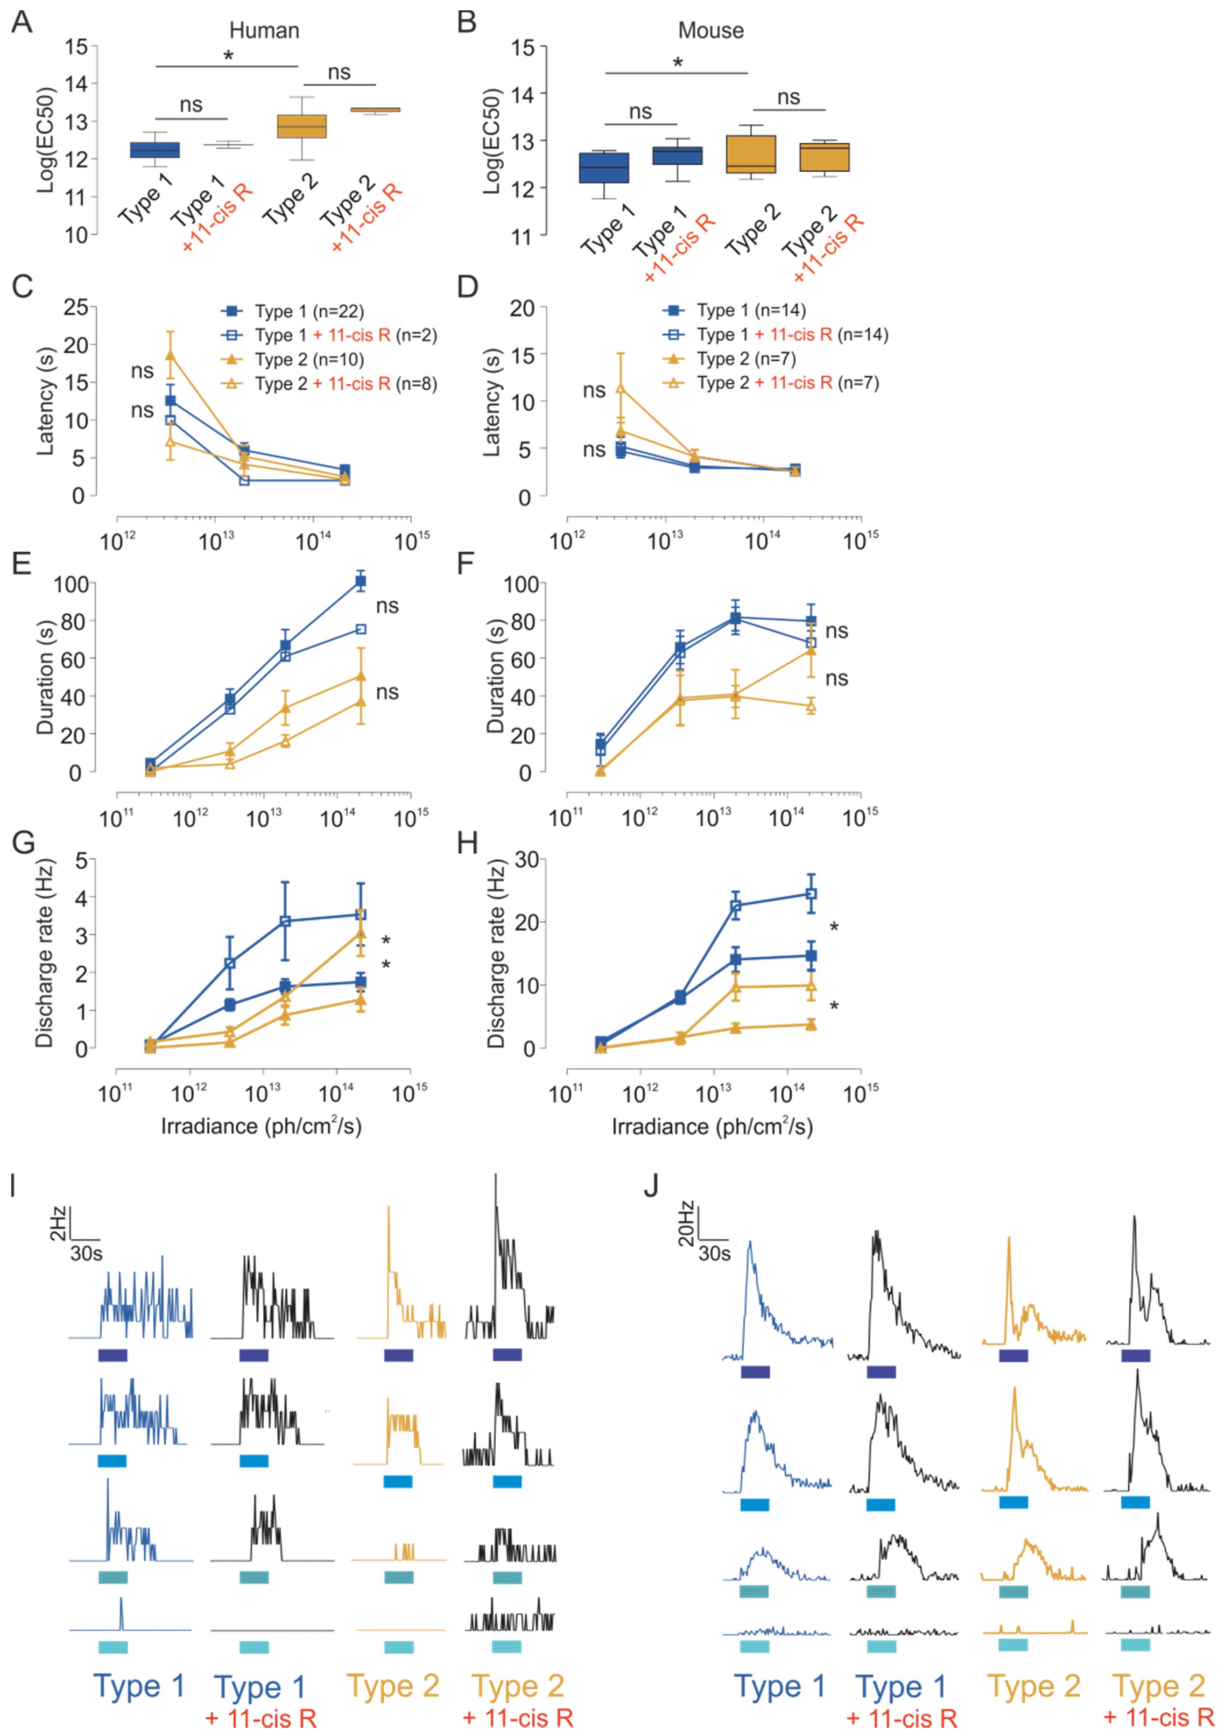

**Fig. S3: Effect of 11-cis retinal on type 1 and 2 ipRGCs:** Sensitivity, latency, duration, discharge rate, and representative time course of type 1 and 2 light responses in human (**A, C, E, G, I**) and mouse (**B, D, F, H, J**) either with or without supply of *11-cis* retinal to the medium. In humans, type 1 and 2 ipRGCs are from different donors and the same donor before/after addition of 11-cis retinal (type 1 n=22 and 2, type 2 n=10 and 8 respectively). In mice, the same type 1 and 2 cells are compared before/after addition of 11-cis retinal (type 1 n=14, type 2 n=7). (**A**) unpaired t-test, (**B**) paired t-test, and (**C-H**) 2way ANOVA. \* p<0.05.

A

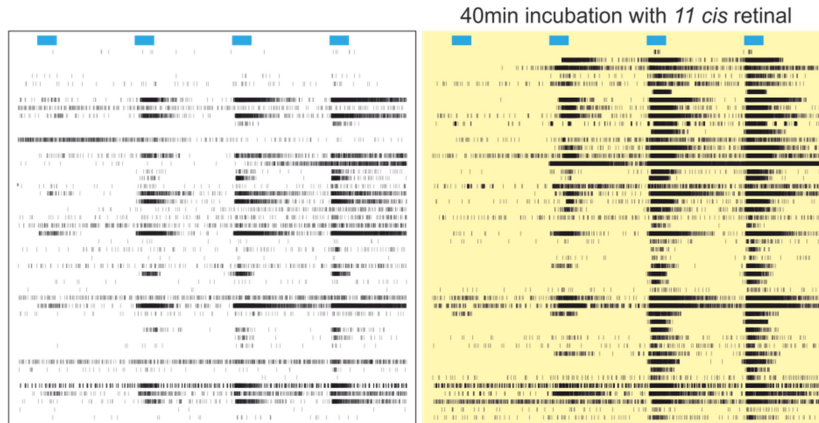

B

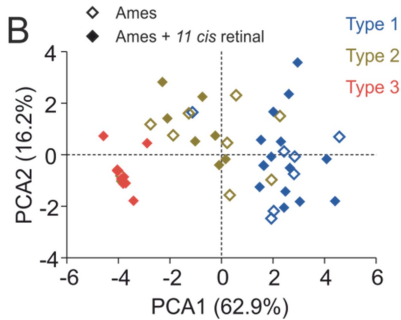

C

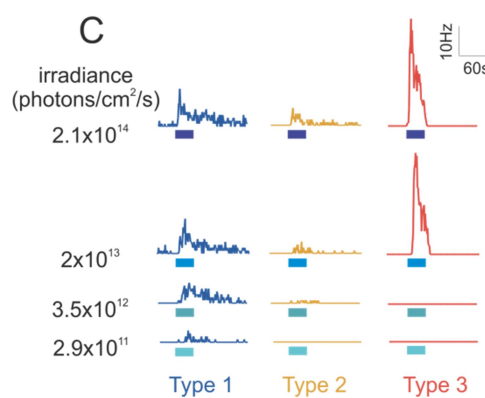

D

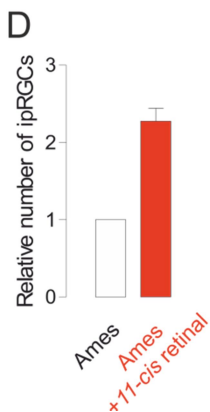

**Fig. S4: Mouse ipRGCs display similar subtypes.** (A) Examples of responses to light from several channels from a piece of the retina before (left panel) and after addition of *11-cis* retinal to the recording medium (*right panel*). (B) Corresponding PCA of ipRGCs response parameters (sensitivity, latency, and duration) before (*empty symbols*) and after (*full symbols*) addition of *11-cis* retinal to the medium. (C) Representative responses from type 1, 2, and 3 mouse ipRGCs to increasing irradiance light pulses (30s, from  $2 \times 10^{11}$  to  $2 \times 10^{14}$  photons/cm<sup>2</sup>/s, 470nm). *Blue bars: light pulse*. (D) Relative number of responding cells before and after addition of *11-cis* retinal to the medium (n= 29 and 71 cells, 3 mice).

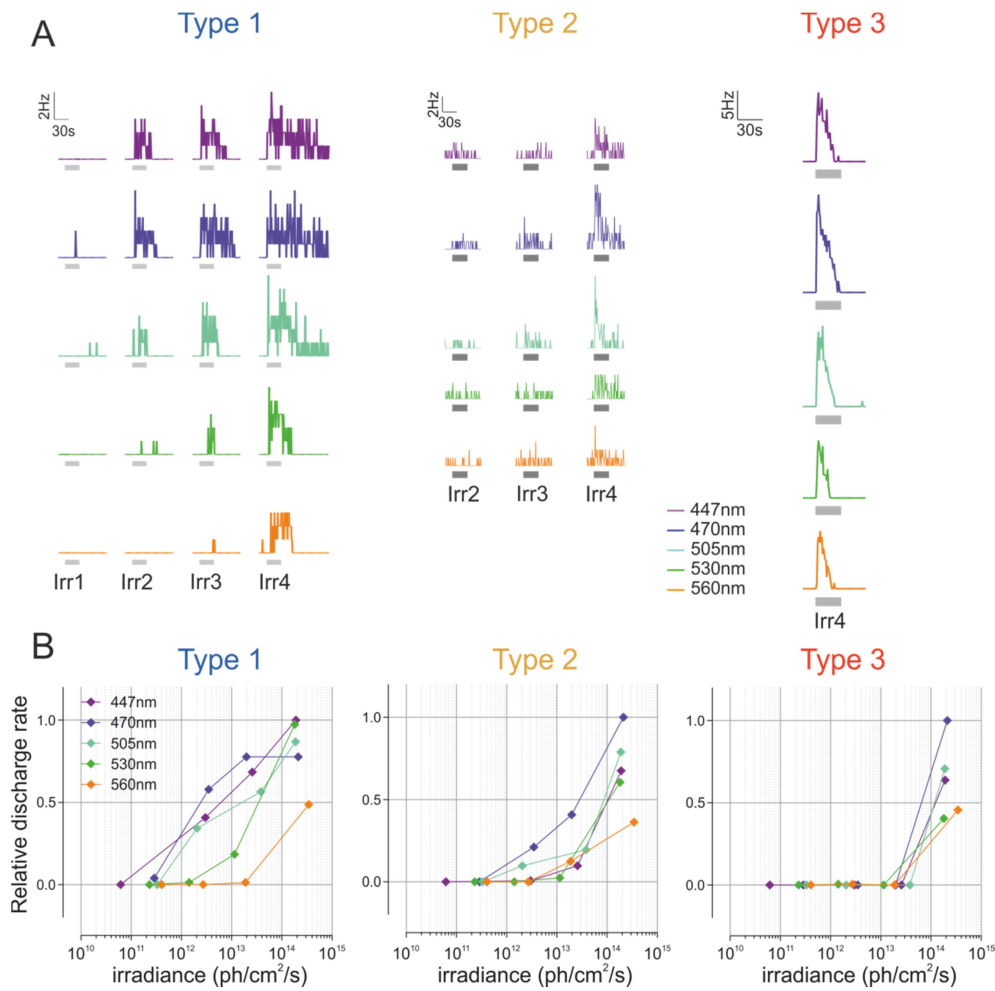

**Fig. S5: Spectral functions of human ipRGCs.** Traces and corresponding DRC of individual examples of type 1, 2, and 3 ipRGCs responses to 30s light pulses at different irradiances and wavelengths (Irr1 to Irr4, from  $2 \times 10^{11}$  to  $2 \times 10^{14}$  photons/cm<sup>2</sup>/s, 447, 470, 505, 530, and 560nm).

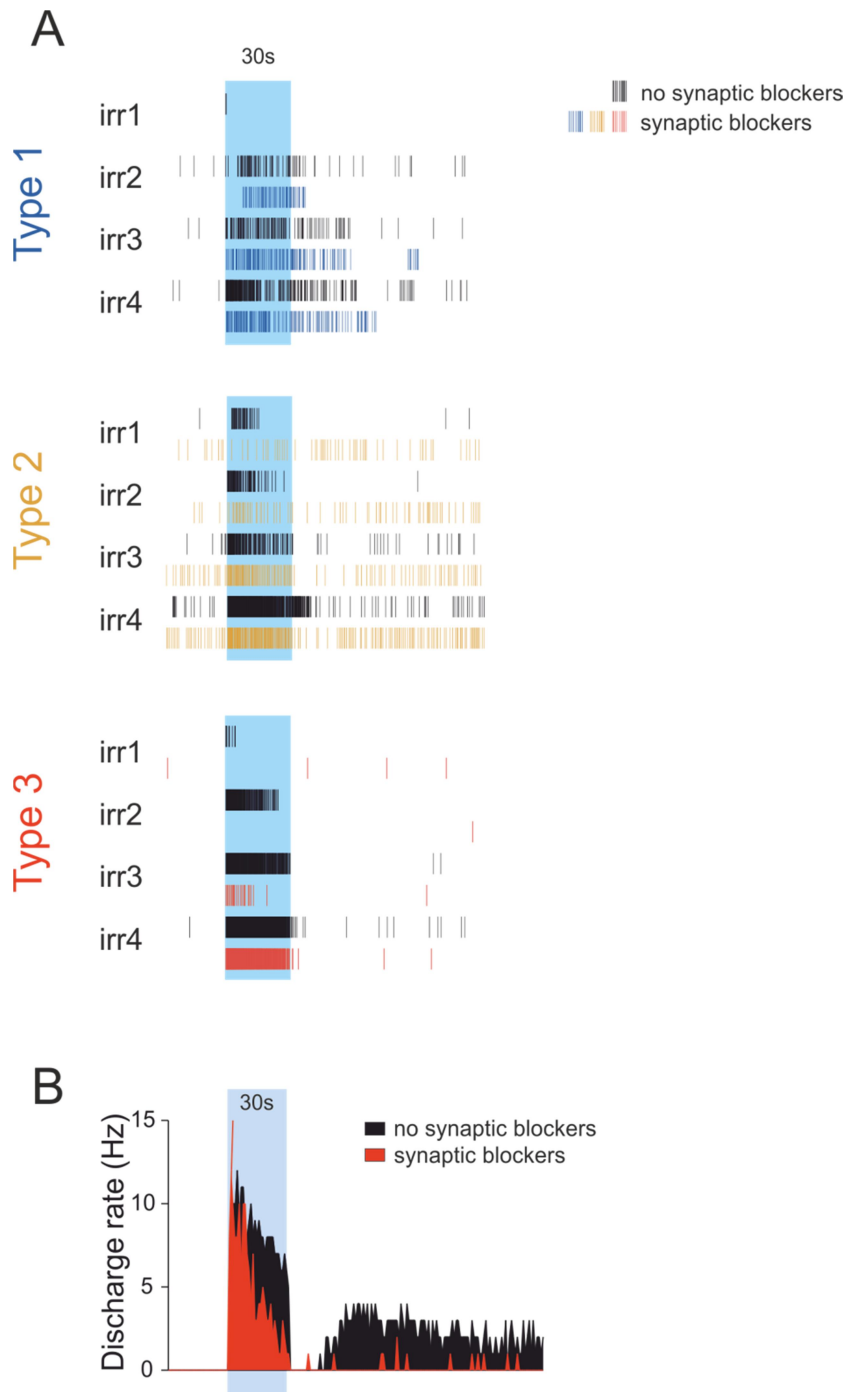

**Fig. S6: Human ipRGCs integrate extrinsic signals.** (A) Example rasters plot of type 1, 2, and 3 ipRGCs responses to increasing irradiance light pulses (30s, from  $2 \times 10^{11}$  to  $2 \times 10^{14}$  photons/cm<sup>2</sup>/s, irr1 to 4, 470nm, blue background) before (black traces) and after (color traces) application of synaptic blockers. (B) Example of extrinsic inhibited response at light OFF (30s,  $2 \times 10^{14}$  photons/cm<sup>2</sup>/s, 470nm).

**TableS1: Melanopsin-dependent visual and non-visual responses to light**

|            | Authors              | Date | Response                                              | Stimuli                          | Peak (nm) | Duration (s) | Ref  |
|------------|----------------------|------|-------------------------------------------------------|----------------------------------|-----------|--------------|------|
| Non-visual | Thapan et al.        | 2001 | Melatonin suppression                                 | 6wl, 5-8 irr                     | 459       | 1800         | (26) |
|            | Brainard et al.      | 2001 | Melatonin suppression                                 | 9wl, 6-10 irr                    | 464       | 5400         | (27) |
|            | Najjar et al.        | 2014 | Melatonin suppression                                 | 9wl, iso irradiance              | 484       | 3600         | (28) |
|            | Bouma                | 1962 | PLR                                                   | 9wl, >10 irr                     | 490       | NA           | (29) |
|            | Gamlin et al.        | 2007 | PLR                                                   | 8wl, iso irradiance              | 482       | 10           | (30) |
|            | Mure et al.          | 2009 | PLR                                                   | 10wl, 6 irr                      | 460-480   | 10 to 300    | (31) |
|            | Meylan et al.        | 2005 | Electrical response<br>(Heterologous expression)      | 5wl, iso irr                     | <440      | 10           | (32) |
|            | Bailes et al.        | 2013 | Calcium increase<br>(Heterologous expression)         | 6wl, 10 irr                      | 479       | 2            | (33) |
|            | Cajochen et al.      | 2005 | Heart rate                                            | Blue (460nm) vs<br>green (550nm) |           | 7200         | (34) |
|            | Vandewalle et al.    | 2007 | Working memory                                        | Blue (470nm) vs<br>green (550nm) |           | 1080         | (35) |
|            | Vandewalle et al.    | 2013 | Cognitive brain activity<br>(visually blind subjects) | Blue (480nm)                     |           | 2            | (36) |
| Visual     | Hankins and<br>Lucas | 2002 | Adaptation of cone visual<br>pathway                  | 6wl, 5-9<br>irradiance           | 483       | 900          | (37) |
|            | Zaidi et al.         | 2007 | Visual awareness<br>(visually blind subjects)         | 9wl, iso irradiance              | 481       | 10           | (38) |
|            | Brown et al.         | 2012 | Brightness discrimination                             | Melanopsin-<br>targeted          |           |              | (39) |
|            | Spitchan et al.      | 2017 | Visual cortex response                                | Melanopsin-<br>targeted          |           |              | (40) |
|            | Vandewalle et al.    | 2018 | Visual cortex response<br>(visually blind subjects)   | Blue (465nm)                     |           |              | (41) |
|            | Allen et al.         | 2019 | Form vision                                           | Melanopsin-<br>targeted          |           |              | (42) |

*PLR, pupillary reflex to light; wl, wavelength; irr, irradiances*

**Table S2: Donors information**

| <b>Donor</b> | <b>Sex</b> | <b>Age<br/>(years)</b> | <b>COD</b>                                     | <b>TOD</b> | <b>Delay<br/>(hours)</b> |
|--------------|------------|------------------------|------------------------------------------------|------------|--------------------------|
| 1            | F          | 74                     | Liver disease                                  | 2.56PM     | 5                        |
| 2            | M          | 54                     | Subarachnoid hemorrhage after trauma           | 2.36AM     | 1                        |
| 3            | F          | 48                     | Respiratory arrest after prescription overdose | 9.25PM     | 0.5                      |
| 4            | M          | 55                     | Gastrointestinal bleed                         | 3.36PM     | 1                        |
| 5            | F          | 55                     | Intracranial hemorrhage                        | 8.30AM     | 2                        |

Summary of the donors' information: age, sex, cause and time of death (COD and TOD) and the time between death and tissue sampling (delay).



**Table S3: Human ipRGCs subtypes responses properties**

|                                   | Type1<br><b>Fast ON-slow OFF</b> | Type2<br><b>Slow ON-slow OFF</b> | Type3<br><b>Fast ON-Fast OFF</b> |
|-----------------------------------|----------------------------------|----------------------------------|----------------------------------|
| Abundancy                         | >type2, <type3                   | <types 1,3                       | >types 1,2                       |
| Latency                           | short                            | long                             | short                            |
| Duration                          | long                             | long                             | short                            |
| Sensitivity                       | high                             | intermediate                     | low                              |
| <i>11-cis</i> retinal requirement | No                               | No                               | Yes                              |
| Extrinsic response                | ON, small and transient          | ON, large and sustained          | ON, large and sustained, OFF     |
| Mouse homolog                     | M1<br>(type III(3))              | M2<br>(type II(3))               | M3-6?<br>(type I(3))             |

## References and Notes

1. M. T. H. Do, K.-W. Yau, Intrinsically photosensitive retinal ganglion cells. *Physiol. Rev.* **90**, 1547–1581 (2010). [doi:10.1152/physrev.00013.2010](https://doi.org/10.1152/physrev.00013.2010) [Medline](#)
2. T. M. Schmidt, S.-K. Chen, S. Hattar, Intrinsically photosensitive retinal ganglion cells: Many subtypes, diverse functions. *Trends Neurosci.* **34**, 572–580 (2011). [doi:10.1016/j.tins.2011.07.001](https://doi.org/10.1016/j.tins.2011.07.001) [Medline](#)
3. D. C. Tu, D. Zhang, J. Demas, E. B. Slutsky, I. Provencio, T. E. Holy, R. N. Van Gelder, Physiologic diversity and development of intrinsically photosensitive retinal ganglion cells. *Neuron* **48**, 987–999 (2005). [doi:10.1016/j.neuron.2005.09.031](https://doi.org/10.1016/j.neuron.2005.09.031) [Medline](#)
4. X. Zhao, B. K. Stafford, A. L. Godin, W. M. King, K. Y. Wong, Photoresponse diversity among the five types of intrinsically photosensitive retinal ganglion cells. *J. Physiol.* **592**, 1619–1636 (2014). [doi:10.1113/jphysiol.2013.262782](https://doi.org/10.1113/jphysiol.2013.262782) [Medline](#)
5. I. Provencio, I. R. Rodriguez, G. Jiang, W. P. Hayes, E. F. Moreira, M. D. Rollag, A novel human opsin in the inner retina. *J. Neurosci.* **20**, 600–605 (2000). [doi:10.1523/JNEUROSCI.20-02-00600.2000](https://doi.org/10.1523/JNEUROSCI.20-02-00600.2000) [Medline](#)
6. S. Nasir-Ahmad, S. C. S. Lee, P. R. Martin, U. Grünert, Melanopsin-expressing ganglion cells in human retina: Morphology, distribution, and synaptic connections. *J. Comp. Neurol.* **527**, 312–327 (2019). [doi:10.1002/cne.24176](https://doi.org/10.1002/cne.24176) [Medline](#)
7. H.-W. Liao, X. Ren, B. B. Peterson, D. W. Marshak, K.-W. Yau, P. D. Gamlin, D. M. Dacey, Melanopsin-expressing ganglion cells on macaque and human retinas form two morphologically distinct populations. *J. Comp. Neurol.* **524**, 2845–2872 (2016). [doi:10.1002/cne.23995](https://doi.org/10.1002/cne.23995) [Medline](#)
8. J. Hannibal, A. T. Christiansen, S. Heegaard, J. Fahrenkrug, J. F. Kiilgaard, Melanopsin expressing human retinal ganglion cells: Subtypes, distribution, and intraretinal connectivity. *J. Comp. Neurol.* **525**, 1934–1961 (2017). [doi:10.1002/cne.24181](https://doi.org/10.1002/cne.24181) [Medline](#)
9. G. Esquivia, P. Lax, J. J. Pérez-Santonja, J. M. García-Fernández, N. Cuenca, Loss of Melanopsin-Expressing Ganglion Cell Subtypes and Dendritic Degeneration in the Aging Human Retina. *Front. Aging Neurosci.* **9**, 79 (2017). [doi:10.3389/fnagi.2017.00079](https://doi.org/10.3389/fnagi.2017.00079) [Medline](#)
10. K. A. Jones, M. Hatori, L. S. Mure, J. R. Bramley, R. Artymyshyn, S.-P. Hong, M. Marzabadi, H. Zhong, J. Sprouse, Q. Zhu, A. T. E. Hartwick, P. J. Sollars, G. E. Pickard, S. Panda, Small-molecule antagonists of melanopsin-mediated phototransduction. *Nat. Chem. Biol.* **9**, 630–635 (2013). [doi:10.1038/nchembio.1333](https://doi.org/10.1038/nchembio.1333) [Medline](#)
11. K. Y. Wong, A retinal ganglion cell that can signal irradiance continuously for 10 hours. *J. Neurosci.* **32**, 11478–11485 (2012). [doi:10.1523/JNEUROSCI.1423-12.2012](https://doi.org/10.1523/JNEUROSCI.1423-12.2012) [Medline](#)
12. K. Y. Wong, F. A. Dunn, D. M. Graham, D. M. Berson, Synaptic influences on rat ganglion-cell photoreceptors. *J. Physiol.* **582**, 279–296 (2007). [doi:10.1113/jphysiol.2007.133751](https://doi.org/10.1113/jphysiol.2007.133751) [Medline](#)
13. D. M. Berson, F. A. Dunn, M. Takao, Phototransduction by retinal ganglion cells that set the circadian clock. *Science* **295**, 1070–1073 (2002). [doi:10.1126/science.1067262](https://doi.org/10.1126/science.1067262) [Medline](#)

14. D. Karnas, D. Hicks, J. Mordel, P. Pévet, H. Meissl, Intrinsic photosensitive retinal ganglion cells in the diurnal rodent, *Arvicantha ansorgei*. *PLOS ONE* **8**, e73343 (2013). [doi:10.1371/journal.pone.0073343](https://doi.org/10.1371/journal.pone.0073343) [Medline](#)
15. D. M. Dacey, H.-W. Liao, B. B. Peterson, F. R. Robinson, V. C. Smith, J. Pokorny, K.-W. Yau, P. D. Gamlin, Melanopsin-expressing ganglion cells in primate retina signal colour and irradiance and project to the LGN. *Nature* **433**, 749–754 (2005). [doi:10.1038/nature03387](https://doi.org/10.1038/nature03387) [Medline](#)
16. L. E. Quattrochi, M. E. Stabio, I. Kim, M. C. Ilardi, P. Michelle Fogerson, M. L. Leyrer, D. M. Berson, The M6 cell: A small-field bistratified photosensitive retinal ganglion cell. *J. Comp. Neurol.* **527**, 297–311 (2019). [doi:10.1002/cne.24556](https://doi.org/10.1002/cne.24556) [Medline](#)
17. Y. Fu, H. Zhong, M.-H. H. Wang, D.-G. Luo, H.-W. Liao, H. Maeda, S. Hattar, L. J. Frishman, K.-W. Yau, Intrinsically photosensitive retinal ganglion cells detect light with a vitamin A-based photopigment, melanopsin. *Proc. Natl. Acad. Sci. U.S.A.* **102**, 10339–10344 (2005). [doi:10.1073/pnas.0501866102](https://doi.org/10.1073/pnas.0501866102) [Medline](#)
18. S. Panda, I. Provencio, D. C. Tu, S. S. Pires, M. D. Rollag, A. M. Castrucci, M. T. Pletcher, T. K. Sato, T. Wiltshire, M. Andahazy, S. A. Kay, R. N. Van Gelder, J. B. Hogenesch, Melanopsin is required for non-image-forming photic responses in blind mice. *Science* **301**, 525–527 (2003). [doi:10.1126/science.1086179](https://doi.org/10.1126/science.1086179) [Medline](#)
19. T. D. Lamb, Photoreceptor spectral sensitivities: Common shape in the long-wavelength region. *Vision Res.* **35**, 3083–3091 (1995). [doi:10.1016/0042-6989\(95\)00114-F](https://doi.org/10.1016/0042-6989(95)00114-F) [Medline](#)
20. G. W. Weinstein, R. R. Hobson, F. H. Baker, Extracellular recordings from human retinal ganglion cells. *Science* **171**, 1021–1022 (1971). [doi:10.1126/science.171.3975.1021](https://doi.org/10.1126/science.171.3975.1021) [Medline](#)
21. T. W. Kraft, D. M. Schneeweis, J. L. Schnapf, Visual transduction in human rod photoreceptors. *J. Physiol.* **464**, 747–765 (1993). [doi:10.1113/jphysiol.1993.sp019661](https://doi.org/10.1113/jphysiol.1993.sp019661) [Medline](#)
22. Z. Jiang, W. W. S. Yue, L. Chen, Y. Sheng, K.-W. Yau, Cyclic-Nucleotide- and HCN-Channel-Mediated Phototransduction in Intrinsically Photosensitive Retinal Ganglion Cells. *Cell* **175**, 652–664.e12 (2018). [doi:10.1016/j.cell.2018.08.055](https://doi.org/10.1016/j.cell.2018.08.055) [Medline](#)
23. N. L. Mata, R. A. Radu, R. S. Clemmons, G. H. Travis, Isomerization and oxidation of vitamin a in cone-dominant retinas: A novel pathway for visual-pigment regeneration in daylight. *Neuron* **36**, 69–80 (2002). [doi:10.1016/S0896-6273\(02\)00912-1](https://doi.org/10.1016/S0896-6273(02)00912-1) [Medline](#)
24. C. D. Bridges, R. A. Alvarez, S. L. Fong, Vitamin A in human eyes: Amount, distribution, and composition. *Invest. Ophthalmol. Vis. Sci.* **22**, 706–714 (1982). [Medline](#)
25. M. T. Flood, C. D. Bridges, R. A. Alvarez, W. S. Blamer, P. Gouras, Vitamin A utilization in human retinal pigment epithelial cells in vitro. *Invest. Ophthalmol. Vis. Sci.* **24**, 1227–1235 (1983). [Medline](#)
26. K. Thapan, J. Arendt, D. J. Skene, An action spectrum for melatonin suppression: Evidence for a novel non-rod, non-cone photoreceptor system in humans. *J. Physiol.* **535**, 261–267 (2001). [doi:10.1111/j.1469-7793.2001.t01-1-00261.x](https://doi.org/10.1111/j.1469-7793.2001.t01-1-00261.x) [Medline](#)

27. G. C. Brainard, J. P. Hanifin, J. M. Greeson, B. Byrne, G. Glickman, E. Gerner, M. D. Rollag, Action spectrum for melatonin regulation in humans: Evidence for a novel circadian photoreceptor. *J. Neurosci.* **21**, 6405–6412 (2001). [doi:10.1523/JNEUROSCI.21-16-06405.2001](https://doi.org/10.1523/JNEUROSCI.21-16-06405.2001) [Medline](#)
28. R. P. Najjar, C. Chiquet, P. Teikari, P.-L. Cornut, B. Claustrat, P. Denis, H. M. Cooper, C. Gronfier, Aging of non-visual spectral sensitivity to light in humans: Compensatory mechanisms? *PLOS ONE* **9**, e85837 (2014). [doi:10.1371/journal.pone.0085837](https://doi.org/10.1371/journal.pone.0085837) [Medline](#)
29. H. Bouma, Size of the static pupil as a function of wavelength and luminosity of the light incident on the human eye. *Nature* **193**, 690–691 (1962). [doi:10.1038/193690a0](https://doi.org/10.1038/193690a0) [Medline](#)
30. P. D. R. Gamlin, D. H. McDougal, J. Pokorny, V. C. Smith, K.-W. Yau, D. M. Dacey, Human and macaque pupil responses driven by melanopsin-containing retinal ganglion cells. *Vision Res.* **47**, 946–954 (2007). [doi:10.1016/j.visres.2006.12.015](https://doi.org/10.1016/j.visres.2006.12.015) [Medline](#)
31. L. S. Mure, P.-L. Cornut, C. Rieux, E. Drouyer, P. Denis, C. Gronfier, H. M. Cooper, Melanopsin bistability: A fly’s eye technology in the human retina. *PLOS ONE* **4**, e5991 (2009). [doi:10.1371/journal.pone.0005991](https://doi.org/10.1371/journal.pone.0005991) [Medline](#)
32. Z. Melyan, E. E. Tarttelin, J. Bellingham, R. J. Lucas, M. W. Hankins, Addition of human melanopsin renders mammalian cells photoresponsive. *Nature* **433**, 741–745 (2005). [doi:10.1038/nature03344](https://doi.org/10.1038/nature03344) [Medline](#)
33. H. J. Bailes, R. J. Lucas, Human melanopsin forms a pigment maximally sensitive to blue light ( $\lambda_{\max} \approx 479$  nm) supporting activation of G(q/11) and G(i/o) signalling cascades. *Proc. Biol. Sci.* **280**, 20122987 (2013). [doi:10.1098/rspb.2012.2987](https://doi.org/10.1098/rspb.2012.2987) [Medline](#)
34. C. Cajochen, M. Münch, S. Kobińska, K. Kräuchi, R. Steiner, P. Oelhafen, S. Orgül, A. Wirz-Justice, High sensitivity of human melatonin, alertness, thermoregulation, and heart rate to short wavelength light. *J. Clin. Endocrinol. Metab.* **90**, 1311–1316 (2005). [doi:10.1210/jc.2004-0957](https://doi.org/10.1210/jc.2004-0957) [Medline](#)
35. G. Vandewalle, S. Gais, M. Schabus, E. Balteau, J. Carrier, A. Darsaud, V. Sterpenich, G. Albouy, D. J. Dijk, P. Maquet, Wavelength-dependent modulation of brain responses to a working memory task by daytime light exposure. *Cereb. Cortex* **17**, 2788–2795 (2007). [doi:10.1093/cercor/bhm007](https://doi.org/10.1093/cercor/bhm007) [Medline](#)
36. G. Vandewalle, O. Collignon, J. T. Hull, V. Daneault, G. Albouy, F. Lepore, C. Phillips, J. Doyon, C. A. Czeisler, M. Dumont, S. W. Lockley, J. Carrier, Blue light stimulates cognitive brain activity in visually blind individuals. *J. Cogn. Neurosci.* **25**, 2072–2085 (2013). [doi:10.1162/jocn\\_a\\_00450](https://doi.org/10.1162/jocn_a_00450) [Medline](#)
37. M. W. Hankins, R. J. Lucas, The primary visual pathway in humans is regulated according to long-term light exposure through the action of a nonclassical photopigment. *Curr. Biol.* **12**, 191–198 (2002). [doi:10.1016/S0960-9822\(02\)00659-0](https://doi.org/10.1016/S0960-9822(02)00659-0) [Medline](#)
38. F. H. Zaidi, J. T. Hull, S. N. Peirson, K. Wulff, D. Aeschbach, J. J. Gooley, G. C. Brainard, K. Gregory-Evans, J. F. Rizzo 3rd, C. A. Czeisler, R. G. Foster, M. J. Moseley, S. W. Lockley, Short-wavelength light sensitivity of circadian, pupillary, and visual awareness in humans lacking an outer retina. *Curr. Biol.* **17**, 2122–2128 (2007). [doi:10.1016/j.cub.2007.11.034](https://doi.org/10.1016/j.cub.2007.11.034) [Medline](#)

39. T. M. Brown, S. Tsujimura, A. E. Allen, J. Wynne, R. Bedford, G. Vickery, A. Vugler, R. J. Lucas, Melanopsin-based brightness discrimination in mice and humans. *Curr. Biol.* **22**, 1134–1141 (2012). [doi:10.1016/j.cub.2012.04.039](https://doi.org/10.1016/j.cub.2012.04.039) [Medline](#)
40. M. Spitschan, A. S. Bock, J. Ryan, G. Frazzetta, D. H. Brainard, G. K. Aguirre, The human visual cortex response to melanopsin-directed stimulation is accompanied by a distinct perceptual experience. *Proc. Natl. Acad. Sci. U.S.A.* **114**, 12291–12296 (2017). [doi:10.1073/pnas.1711522114](https://doi.org/10.1073/pnas.1711522114) [Medline](#)
41. G. Vandewalle, M. J. van Ackeren, V. Daneault, J. T. Hull, G. Albouy, F. Lepore, J. Doyon, C. A. Czeisler, M. Dumont, J. Carrier, S. W. Lockley, O. Collignon, Light modulates oscillatory alpha activity in the occipital cortex of totally visually blind individuals with intact non-image-forming photoreception. *Sci. Rep.* **8**, 16968 (2018). [doi:10.1038/s41598-018-35400-9](https://doi.org/10.1038/s41598-018-35400-9) [Medline](#)
42. A. E. Allen, F. P. Martial, R. J. Lucas, Form vision from melanopsin in humans. *Nat. Commun.* **10**, 2274 (2019). [doi:10.1038/s41467-019-10113-3](https://doi.org/10.1038/s41467-019-10113-3) [Medline](#)
